# Supplementary material
Source: Research Square preprint supplement (doi:10.21203/rs.3.rs-9404382/v1)
Supplement: Supplementary file 1 [file f64f05d4a1efb6491819a86d.xlsx]

## Sheet: Regulon DB
	average	average	average
	45.4632	18.7684	2.01585
	stdev	stdev	stdev
	88.1108	4.544	0.31293
	count	count	count
	95	95	95
	SEM	SEM	SEM
	9.03997	0.466204	0.032106
Regulon_Name	motif instances	site length	N_evolved
Dan	6	7	0.570465
BtsR	12	11	1.23359
NrdR	6	14	1.51058
SrsR	17	13	1.51846
NsrR	44	13	1.63371
GlaR	112	12	1.63901
MalT	20	14	1.64624
H-NS	135	12	1.66472
TrpR	10	15	1.66774
GalS	13	15	1.69717
MqsA	6	16	1.70612
RutR	6	16	1.70612
CaiF	8	16	1.73707
MetR	9	16	1.74991
RbsR	4	17	1.75153
RcsB	10	16	1.76147
CytR	24	15	1.76797
SlyA	25	15	1.77279
ZraR	28	15	1.78624
GalR	13	16	1.79059
PuuR	8	17	1.82442
RelBE	4	18	1.83376
UlaR	4	18	1.83376
NarP	23	16	1.85559
PutA	5	18	1.85664
BaeR	5	18	1.85664
HipAB	5	18	1.85664
MelR	11	17	1.85892
IHF	121	14	1.87211
MraZ	6	18	1.87554
GadE	14	17	1.88548
IclR	8	18	1.90575
RhaS	8	18	1.90575
AscG	9	18	1.91826
Rob	20	17	1.92546
PurR	22	17	1.93628
FlhDC	24	17	1.94622
PlaR	6	19	1.95181
CsgD	26	17	1.9554
DnaA	29	17	1.96801
RcdA	15	18	1.97348
MarA	31	17	1.97574
DeoR	8	19	1.98159
RacR	4	20	1.98251
FeaR	4	20	1.98251
SoxS	38	17	1.99955
TyrR	20	18	2.00528
PdhR	21	18	2.01072
AraC	23	18	2.02091
GlrR	6	20	2.02311
NarL	97	16	2.03024
QseB	7	20	2.03876
SdiA	7	20	2.03876
Ada	4	21	2.04989
CpxR	135	16	2.07262
EvgA	10	20	2.07545
FadR	20	19	2.0795
BasR	11	20	2.08536
PhoP	41	18	2.08686
ArgP	23	19	2.09485
SoxR	8	21	2.11868
MetJ	30	19	2.12435
ArcA	234	16	2.14511
Lrp	443	15	2.14728
NtrC	38	19	2.15094
PhoB	40	19	2.15676
TorR	23	20	2.1637
NhaR	23	20	2.1637
Nac	503	15	2.16554
FhlA	8	22	2.18078
FNR	170	17	2.18376
OxyR	56	19	2.19529
GcvA	10	22	2.20301
DcuR	10	22	2.20301
AgaR	11	22	2.21257
Cra	69	19	2.21955
GlpR	23	21	2.22795
HipB	8	23	2.23906
YdeO	8	23	2.23906
LexA	48	20	2.24478
ArgR	66	20	2.28081
ModE	7	24	2.28112
Fis	250	18	2.30735
LeuO	18	23	2.31941
Mlc	7	25	2.33295
GadX	44	23	2.41132
NagC	27	24	2.41311
OmpR	52	23	2.4289
NanR	12	27	2.47696
IscR	13	28	2.52694
CRP	388	21	2.54882
Fur	251	22	2.55057
XylR	8	30	2.56368
MlrA	4	37	2.73702
CysB	18	39	2.90053

## Sheet: ELM resource
	average	average	average	average
	13.2874	6.75197	4.75661	7.3752
	stdev	stdev	stdev	stdev
	16.2952	3.35005	3.7831	3.5423
	count	count	count	count
	254	254	251	254
	SEM	SEM	SEM	SEM
	1.02245	0.210201	0.238787	0.222264
ELM regular expression	motif instances	site length	N_evolved from L, number of sites	N_evolved from regular expression
[DSTE][^P][^DEWHFYC]D[GSAN]	41	5	3.44642	8.2
[ILV]..R[VF][GS]	12	6	4.09222	8
RK	2	2	0.0256905	1
R.[RK]R	13	4	1.47018	6
[KR]R	1	2	0.0181659	1.5
KR	6	2	0.0444972	1
R...[KR]R	1	6	2.70455	10.6667
[RK].[AILMFV][LTKF]	2	4	0.920753	8
S[IVLMH]E[IVPFMLYAQR]GR	4	6	3.40752	3.16667
E[IMPVL][MLVP]R	5	4	1.15779	2.75
Q[MLVI]DG..[DE]	2	7	4.26876	7
R..L..[LIVM]	18	7	5.84282	12.2857
KEN	16	3	0.558534	1
[STDE][TSDE]..VP[STDE][FLIMVYPA]	12	8	6.896	7.75
[ILMV][ST][DEN][FY][FY]..[KR][KR][^DE]	6	10	8.7999	7.5
[AP]P[MV][IM]V	1	5	1.63988	1.6
[DNS].[DES][TNS]GE	13	6	4.14717	5.16667
QD.DLGV	1	7	3.86632	3.71429
[PGA]PG[AG]PP	11	6	4.0333	1.5
E.EE.E[AV]DQH	4	10	8.45023	4.9
F[^P][^P][^P]W[^P][^P][VIL]	5	8	6.18117	12.5
[IL]AP......[FLIVM].[FLIVM]	8	12	11.2347	12.8333
[RK][RK].SL..F[FLM].[RK]R[HRK].[RK]	9	15	14.0463	7.86667
[LIVMP]TP..[ST]	6	6	3.64575	8.16667
[DE].TP.K	3	6	3.24799	7.5
[VLIA][VLI]GWPP[VLI]...R	24	11	11.2563	6.81818
DSG..[ST]	19	6	4.41795	7.5
P.A.V.P[^P]	9	8	6.65243	10.375
[AVP].[ST][ST][ST]	8	5	2.48559	5.8
F..[FWY][ST][FY]	10	6	3.96974	8
R..[PGAV][DEIP]G	17	6	4.3368	8.33333
[FYLIM]..[YVILA]P.L	10	7	5.37223	10.2857
[MPVLIFWYQ].TP	8	4	1.30214	7.75
[FLV][^P][^P][KR]L[^P][^P][LMIV][^P][^P][^P]R	3	12	10.353	12
[^EDWNSG][^D][RK][^D]L[FL][EDST]	31	7	6.31465	8.71429
N[KR]L.F	13	5	2.73905	5
PP..P.F	4	7	4.7131	9.14286
[KR]NL...L	5	7	4.86576	9.28571
L[LMIV]PP	18	4	1.59479	1.75
V[ED]P[^P][RK]FA[^P]ELI[^P]RLE[^P][VIL]	6	17	15.1651	5.47059
[RK]..[LIVP]P.[LIV].[LIVMF]	11	9	8.12727	10.5556
F.[FY]P	15	4	1.52373	6
[KR][KR]..[ILVM].[ILVF]	15	7	5.6926	10.2857
[LIV][^P][^P][RK][RK]G...[LIVP]P.[LIV].[LIVMF]	2	15	12.7062	10.6
[LIV][^P][^P][RK]....[LIVMP].[LIV].[LIVMF]	10	13	12.4169	13.5385
[RK]P[^P][^P]L.[LIVMF]	29	7	6.25477	9.57143
[RK]..[LIVMP].[LIV].[LIVMF]	27	8	7.63168	11.875
[RK][^P][^P][LIM].L.[LIVMF]	17	8	7.20287	11.125
[LIVMPFA].[LIV].[LIVMP]....[LIV]..[RK][RK]	6	14	12.8377	13
[DE]L[^P][^P]R[FL][^P][^P]L	5	9	7.44557	9.22222
[DEN][DEN]..[ILMVA][DEN][DEN]L	4	8	6.01114	7.25
R[^P][DEQ]Q[VIL][RK][^P][YW]	9	8	6.65243	6.25
[RK][VIL][^P][FW]	19	4	1.61649	6.5
[GS]IL[KR][^DE]	14	5	2.77995	4.8
L..[IVLWC].E	18	6	4.37832	11.1667
L.[LIVAPM]P	8	4	1.30214	7
P[^P]I[^P][IV][^P]	10	6	3.96974	10.1667
F..P	15	4	1.52373	10.5
M.PP	2	4	0.920753	5.75
RF[^P][IV]	13	4	1.47018	5.75
[PA][^P][^FYWIL]S[^P]	10	5	2.59903	11.2
K...K	7	5	2.42009	12.4
[ST]P	96	2	0.177989	1.5
R[^DEPG][ST][^PRIKGN]P	65	5	3.77915	6.8
IR[^P][^P]N[^P][^P]WR[^P]W[YFH][ITML][^P]Y[IVL]	1	16	12.9154	8.1875
[IL]..[^P][^P][^P][^P]R.....[IL]..[^P][^P][ILV][ILM]	13	20	17.7127	15.25
R..[ILVMF][ILMVF][^P][^P][ILVM]....LNK[VATI]	9	16	14.8165	11.25
L.D.R..R[PAVT][KRHM][^DEN].R...[PAS][^P]	15	18	16.6614	11.7778
F.[KR]P..[PAS][RK]	4	8	6.01114	8.625
P.LP.[IL].[VLF]	10	8	6.74062	8.5
[DE][DES][DEGAS]F[SGAD][DEAP][LVIMFD]	11	7	5.44588	3.57143
F.D.F	11	5	2.64905	8.6
DP[FW]	54	3	0.8378	1.33333
[ILVMF].[ILMVP][FHY].[DE]	11	6	4.0333	9.16667
DR[YFH][ILFVM][PA]	3	5	2.04284	2.4
[^P][P][^P][YFH][^P]	11	5	2.64905	12.2
[LIFVYMTE][ASGC][^P][^P]L[^P][^P][IVMTL][GACS][D][^P][FVLMI]	19	12	12.0744	10.25
DA.P	3	4	1.01898	5.75
S..F	5	4	1.15779	10.5
[ACLIVTM][^P][^P][ILVMFCT]Q[^P][^P][^P][RK][^P][^P][^P][^P][RKQ][^P][^P]	75	16	16.916	14.3125
W[^P][^P][^P][IL][^P][AGS][AT]	3	8	5.79882	10.5
[STED][IV]W[IVLM].[RHK]	7	6	3.74063	5.66667
[DE][DEN][DEN]D[GDN]Y.P	1	8	5.05475	4.25
L[IVLMF].[IVLMF][DE]	18	5	2.92325	6.6
[NP]W[DES].W	2	5	1.88372	5.4
[FY][^P].[WFY][^P]DY..L	10	10	9.2611	10.6
L[^P][^P][HI]I[^P][^P][IAV][IL]	4	9	7.26324	9.44444
EP[IL]Y[TAG]	20	5	2.9855	1.6
[AFILMPTVW]W[FHILMPSTVW]P	18	4	1.59479	5.25
P[LVIPME][DENS][LM][VASTRG]	32	5	3.27975	3.8
[DE]W.[WF]	5	4	1.15779	6.25
R..S[YFLM][^P][^P][L]	14	8	7.03017	10.625
[^P].[KR].TQT	9	7	5.29198	9.14286
A.GPP..Y	6	7	4.99416	9.42857
PYP.YP	9	6	3.90064	4.16667
P.PGF	3	5	2.04284	4.8
.NPF.	88	5	4.0152	8.6
[FYH].[IVM][^WFYP][^WFYP][ILM][ILMV]	11	7	5.44588	9.28571
Y....L[VILMF]	13	7	5.57741	12.4286
Y.PP.[ILMV]R	5	7	4.86576	6.85714
[FYWL]PP[ALIVTFY]P	19	5	2.95503	2.8
PP..F	8	5	2.48559	8.6
[FY].[FW].....[LMVIF]P.P[DE]	3	13	11.3186	11.7692
[LV][DE][^P][LM][LM][^P][^P]L[^P]	4	9	7.26324	9.44444
T..[DE]	6	4	1.21178	10.75
[FYWHIL].DF[PD]	5	5	2.26259	6
W[VIL].[ST].KT...W	9	11	10.2961	9.90909
[FYLIMV].FG[DES]F	9	6	3.90064	5.33333
[ILV][VA][^P][^P][LI][^P][^P][^P][LM]	12	9	8.20623	11.5556
[EN][FYLW][NSQ].EE[ILMVF][^P][LIVMFA]	5	9	7.44557	6.77778
[CP]PP[ST]P[^P]	8	6	3.82481	4.33333
[QHR]P[PL]PP[GS]H[RH]	3	8	5.79882	1.625
[DE]H.Y	17	4	1.57216	6
[FY][DEP]WM	16	4	1.54852	1.75
P[MVLIRWY]V[MVLIAS][LM]	9	5	2.54484	3.4
NPY	7	3	0.424009	1
G[FL]PGER..G	0	9		5.33333
NGR	8	3	0.443308	1
RGD	25	3	0.648121	1
RGDL[^P][^P][LI]	5	7	4.86576	6.28571
[RK]GDW	18	4	1.59479	1.25
[VILPF].L.IS	7	6	3.74063	8
[VILMFT]K.EP..[DE]	12	8	6.896	8.875
[LMTAFSRI][^KRG]W[DE]...[LIVMFPA]	22	8	7.43879	11.875
[ED][IYVLMTF]Y[LIV][DE]	3	5	2.04284	3
[LFVIM]..[LIVCYFM][FW]...[EDST][EDST]F[^G]GF	9	14	13.215	10.2857
[EDST][WFY]..[ILVFY]	11	5	2.64905	10.4
[VILA]..N.I[RK]	3	7	4.52333	9.71429
[ILVMF]YP.[ILVMF]	19	5	2.95503	6.4
[PA]Y..[AV][^P][^P][^P]L	3	9	7.03474	11.4444
[KR][IV][LV].....P	6	9	7.59794	11.8889
[RK]FP[GA][^DE]P	4	6	3.40752	4.16667
S.[FY][F]	6	4	1.21178	6
GRYFG	3	5	2.04284	1
[LFVAIMW]...[DE][FY][IL][SAPGK][FL]...[DE][DE][DE]	4	15	13.3071	9.73333
Q[RGQ]DF[LI][PS]L[DE]	3	8	5.79882	1.625
P.L.P	6	5	2.34661	8.6
PP.LI	3	5	2.04284	4.8
[LMV]P.LE	2	5	1.88372	5.2
F..A[ILV]..A..[ILV]	2	11	8.98024	11.7273
[^P]L[^P][^P]LL[^P]	24	7	6.08794	11.2857
F[^P][^P][KRIL]H[^P][^P][YLMFH][^P]	3	9	7.03474	11.7778
WF..L	1	5	1.63988	8.6
[LFP][NS][PIVTAFL].A..[FY].[PYLF]	22	10	10.0209	9.9
WPPEF.PG.PWKG	4	13	11.5718	3.92308
[MLIV].[KR][FY][MLIVF][LIV][KR]	2	7	4.26876	5.42857
[QM].[^FHWY][LIVM][^P][^PFWYMLIV][FYHL][FYW]	19	8	7.30372	10
[KR]..[ILM][DE][^P][FY][FLI]	3	8	5.79882	8.875
[KR][QN].[^FHWY][LIVM][^P][^PFWYMLIV][FYLMWV][FYLMWVI]	12	9	8.20623	9.77778
W...[FY]	27	5	3.17018	12.6
LV.EF[LM]	1	6	2.70455	4.33333
MM[NDE][EDNAG]F[LMA]	0	6		2.33333
L..LL...L..F	1	12	9.44723	12.0833
PPP[PA]P[LG]P	16	7	5.74533	1.28571
P[TS]AP	28	4	1.78105	1.25
[^P].NP.[FY]	19	6	4.41795	10.5
[^P].NP.Y	17	6	4.3368	10.3333
[LIMV]..[LM][FY]D	3	6	3.24799	8.16667
FF[KR]	10	3	0.477539	1.33333
[KRS]I[^P][^P][NK][KR][^P][^P]A[^P][^P][RKL][RKL][^P][^P][RK]	4	16	14.0843	10.5625
[ILVM]LG..P	3	6	3.24799	7.83333
[ED]LF[^P][VC]F[ED]	5	7	4.86576	4
[ILVATSRK][^EDN].[NDS]W[RK][^P][^P][LIVAPS]	20	9	8.68547	10.5556
Y[^EPILVFYW][^HDEW][PLIV][^DEW]	36	5	3.35793	10
Y[EDST]N	35	3	0.725046	2
Y[DESTNA][^GWFY][VPAI][DENQSTAGYFP]	17	5	2.89002	7.6
Y[IV].[VILP]	1	4	0.774258	6.75
Y[QDEVAIL][DENPYHI][IPVGAHS]	24	4	1.71371	5.5
Y[DESTA][^GP][^GP][ILVFMWYA]	22	5	3.04296	10
Y..Q	9	4	1.34105	10.5
Y[VLTFIC]	19	2	0.0791833	3.5
GY[KQ].F	1	5	1.63988	5
[RKY]..P..P	8	7	5.20368	12.1429
P..P.[KR]	19	6	4.41795	10.6667
[PV]..P	26	4	1.74835	10.75
KP..[QK]	2	5	1.88372	8.8
P..DY	3	5	2.04284	8.6
P.[AP].PR	60	6	5.35123	7.5
[LIV]..[LM]L.AA.[FY][LI]	4	11	9.56433	8.36364
[FHYM].A[AV].[VAC]L[MV].[MI]	3	10	8.2106	7.5
[FA].[LA][LV][LVI]..[AM]	2	8	5.51224	8.875
[ED][LIV]NNN[^P]	2	6	3.03575	4.5
[SV][CY]GH[LIF][LAST][GAIV]	5	7	4.86576	2.42857
[DEST][VIL][DESTVILMA][VIL][VILM]	17	5	2.89002	4.6
[VILPTM][VIL][DESTVILMA][VIL][DEST]	33	5	3.3	5
[KR][ST].IP[^ED][^ED][^ED][^ED][^ED]	9	10	9.16404	11.6
[PSAT].[QE]E	14	4	1.49767	6.75
P.Q..D	1	6	2.70455	10.5
RL[^P].R	3	5	2.04284	8.4
P[^P]E[^P].[FYWHDE]	34	6	4.8679	11
[FY].L.P	3	5	2.04284	8.8
[DEN]..Y..[LI]......Y..[LI]	7	17	15.3032	14.6471
[ILV].Y..[ILV]	7	6	3.74063	11.1667
T.Y..[IV]	12	6	4.09222	10.6667
[ILM][ILMF].[ILM]K	2	5	1.88372	6.2
[ND].WGI.[LIV][VMLI][ED]	1	9	6.22637	6
[KR][KR].[KR]W	8	5	2.48559	5.4
WG.G[^P].L	17	7	5.7953	9
[ILMV]R[^PG][^PG]R[^PG][^PG][^PG][FL][ED]	3	10	8.2106	10
[RKQ][^P][AG][^P]AA[^P]R[^P]	9	9	7.94807	9.33333
[VMILF][MILVFYHPA][^P][TASKHCV][AVSC][^P][^P][ILVMT][^P][^P][^P][LMTVI][^P][^P][LMVCT][ILVMCA][^P][^P][AIVLMTC]	15	19	17.2716	12.7895
[ED][VIL]D[VI]	3	4	1.01898	2
[SCA]AR[STCA][EQR][PGILVM][HYFQNKRLVI]	7	7	5.10536	4
ES[RK][FY].F[HR][PST][IVLM][DES][DE]	3	11	9.31744	3.72727
[FYILMV].[TS]FG	22	5	3.04296	6
[WFY][KR]P[WFY]	2	4	0.920753	2.25
PP.Y	29	4	1.79674	5.75
PPLP	3	4	1.01898	1
PPR	1	3	0.221654	1
C.[DN]....[FY].C.C	6	12	10.9686	12.25
SP.[KR]	48	4	2.03796	6
[ST]P[RK]	18	3	0.580898	1.66667
S..[ST]	27	4	1.76493	10.75
[ST]..E	34	4	1.86963	10.75
W..W	24	4	1.71371	10.5
G[RK][RK]	0	3		1.66667
R[PSVA].[ST]P	22	5	3.04296	5.6
S[GA]	6	2	0.0444972	1.5
[ST]...[ST]	22	5	3.04296	12.8
H.[KR]..[ST][^P]	23	7	6.05104	12
N[^P][ST]	156	3	1.19321	7.33333
N[^P]C	5	3	0.379023	7
[FLM][^PVIED][^PVID][ST][MLIVF][RKH]	2	6	3.03575	7.33333
C...[ST]C	4	6	3.40752	10.6667
C.S.PC	2	6	3.03575	7.33333
[ST]Q	30	2	0.0994987	1.5
[RK]..S[VI]	1	5	1.63988	9
[RK][RK].[ST][^P]	25	5	3.12176	9
R.R..[ST][^P]	20	7	5.93143	11.8571
[DNE][^PG][ST][FWYLIVM]	44	4	1.99411	7.5
[DE]..[ST][EDILMVFWY][DE]	3	6	3.24799	9.16667
[^IRFW][ST][ILMVFWY][ILMVFWY]	7	4	1.25939	8
GGRGG	24	5	3.09637	1
[ST]P	38	2	0.111982	1.5
GCM[GS][CL][KP]C	2	7	4.26876	1.42857
[VILMAFP]K.E	46	4	2.01639	7.25
[SDE][DE].K[AIFLMPSTV]	20	5	2.9855	7
[TAD][EA].QY[QE].[GQA][PEDLS]	12	9	8.20623	6.33333
[RKTC][IVL]Y[TQHS]Y[IL]QSR	9	9	7.94807	2
[ETA]C[QERK]..F...RWNC[ST]	1	14	11.2955	8.21429
[DE].F[^P][^P][FL][^P][^P][^P]R	4	10	8.45023	12.1
RV.P	2	4	0.920753	5.75
E..[^P]L[LIVM]	23	6	4.56089	10.8333
[^E]..[RP]L[LI]	18	6	4.37832	10.6667
[E]..[RP]L[LI]	18	6	4.37832	7.66667
Y..[LMVIF]	15	4	1.52373	11.5
[LIVMFYWPR]RR	27	3	0.664963	3.66667
[EDS][ED][FY][FYKREM][DE][AC].[EDST]	29	8	7.70015	5.125
S[LW]LD[DE]EL[LM]	4	8	6.01114	1.375
[DEQ][LIM]..[LIVMF][^P][^P][LMVF].[LMIV][DE]	18	11	10.9657	10.8182
[KR][KR].......[^DE]RK[^DE][KR][^DE]	11	15	14.2355	13.4667
[^DE]RK[KRP][KR][^DE]	18	6	4.37832	7.16667
R.LR	5	4	1.15779	5.75
K.L.E	24	5	3.09637	8.6

## Sheet: ATtRACT
	average	average
	7.14567	1.83246
	stdev	stdev
	1.52659	0.318178
	count	count
	254	254
	SEM	SEM
	0.0957867	0.0199643
ATtTRACT motif	site length	N_evolved
M001_0.6	7	1.75141
M244_0.6	7	1.78305
M118_0.6	6	1.89566
M256_0.6	6	2.64313
M226_0.6	6	2.45146
M002_0.6	7	1.72968
M003_0.6	7	1.80321
86	9	1.36444
M171_0.6	7	1.67769
M239_0.6	7	2.03593
M126_0.6	7	1.8549
M117_0.6	7	1.71772
M241_0.6	7	2.05068
s86	7	1.2424
s4	5	2.61774
s5	6	2.34517
M004_0.6	7	2.05927
M157_0.6	7	1.84904
M178_0.6	7	1.9572
M122_0.6	6	2.62009
M138_0.6	7	1.62707
M009_0.6	7	2.17877
M010_0.6	6	1.97415
M137_0.6	7	2.24811
M135_0.6	7	1.99121
M147_0.6	6	1.76304
M008_0.6	7	1.93672
M012_0.6	7	1.80046
M149_0.6	6	1.69822
M125_0.6	6	1.95979
M213_0.6	7	1.7062
M013_0.6	7	2.00035
M217_0.6	7	1.82063
M231_0.6	6	1.9001
M290_0.6	7	2.03775
M116_0.6	7	1.7451
s101	7	1.49518
M031_0.6	7	1.74645
M127_0.6	7	1.82783
M112_0.6	7	1.99832
M232_0.6	7	1.80808
M108_0.6	7	1.90531
s1	5	1.76507
s0	9	1.81419
s2	6	1.65986
s3	7	1.53594
M329_0.6	11	1.66421
M140_0.6	7	2.21656
M141_0.6	7	2.05097
M223_0.6	7	1.69343
M205_0.6	6	2.04637
M174_0.6	7	1.96483
M014_0.6	7	1.79785
M224_0.6	7	1.7435
M225_0.6	7	1.77842
M185_0.6	6	2.43724
130	9	1.46982
s17	10	1.37623
s18	12	1.92375
78	12	1.2806
91	10	1.25535
M016_0.6	7	1.95785
M015_0.6	7	2.35323
M115_0.6	7	1.90981
M017_0.6	7	1.6246
s31	6	1.78799
M152_0.6	6	2.09377
M020_0.6	7	2.0217
33	12	1.50513
M021_0.6	7	1.85167
46	5	1.82468
M198_0.6	7	1.76174
s32	6	1.72898
M022_0.6	7	1.83888
72	6	1.26659
M271_0.6	6	1.53089
M023_0.6	7	1.92034
M024_0.6	7	1.87852
M210_0.6	7	2.09254
M025_0.6	7	1.68833
s13	6	1.54445
M158_0.6	7	1.67409
s43	9	1.99744
s36	7	2.38889
s44	8	2.0007
s35	6	1.94395
171	5	1.82468
131	5	1.82468
142	5	1.82468
M151_0.6	7	2.0064
182	5	1.82468
s15	6	2.02288
s16	7	1.50581
s14	8	1.42941
M026_0.6	7	2.22618
s38	4	2.69729
M089_0.6	7	2.05028
M027_0.6	7	2.01538
169	7	1.2424
M169_0.6	7	1.78774
M242_0.6	7	2.09346
M243_0.6	7	1.9268
M113_0.6	7	1.57376
M090_0.6	7	2.14466
M028_0.6	7	2.15938
M029_0.6	7	1.73064
M092_0.6	7	1.70139
M091_0.6	7	1.98369
M093_0.6	7	1.72634
M030_0.6	7	1.69064
M296_0.6	11	1.47771
M032_0.6	7	2.22878
M163_0.6	7	2.3749
s34	6	1.88379
M160_0.6	7	1.79192
s33	6	1.36847
M060_0.6	7	1.87283
M176_0.6	7	1.98103
s103	7	1.86671
M033_0.6	6	2.0092
175	8	1.63969
41	8	1.63969
61	8	1.22425
81	8	1.30586
1185_17893325.pfm	4	1.18258
M034_0.6	7	1.78961
M119_0.6	6	2.20987
M035_0.6	7	2.07649
M153_0.6	7	2.22171
M187_0.6	6	1.56719
M194_0.6	7	1.8367
M202_0.6	7	1.78111
M179_0.6	7	1.65399
M036_0.6	7	1.87102
s30	6	2.27786
M037_0.6	6	1.93671
M320_0.6a	4	1.5785
M320_0.6	8	1.63475
M172_0.6	7	1.85183
135	8	1.63915
M038_0.6	6	1.96775
M131_0.6	7	2.05089
94	10	1.26723
9	10	1.25535
27	11	1.55504
177	11	1.46397
M096_0.6	7	1.89725
M095_0.6	7	1.94743
M167_0.6	7	2.14932
M040_0.6	7	2.00792
M007_0.6	7	1.67661
131_11376140.pfm	11	1.49128
M206_0.6	7	1.82846
M186_0.6	6	2.00979
M233_0.6	7	1.99703
M307_0.6	5	1.25732
s27	6	1.67211
99	4	1.35126
64	4	1.78782
s28	6	1.67211
s29	7	1.3524
179	4	1.55838
M120_0.6	7	1.9683
M130_0.6	7	1.90571
M218_0.6	7	1.87232
M349_0.6	7	2.0588
M146_0.6	7	1.86947
M144_0.6	7	1.79588
M042_0.6	7	1.78117
M162_0.6	7	2.01449
M148_0.6	6	1.83904
M011_0.6	7	1.73531
M177_0.6	7	2.00233
M207_0.6	6	2.342
M211_0.6	6	2.32793
M043_0.6	7	2.24462
M188_0.6	6	2.25832
M180_0.6	6	2.12098
M208_0.6	7	1.73892
M181_0.6	7	1.84104
M203_0.6	7	2.06864
M182_0.6	7	1.88217
M183_0.6	7	2.03653
75	6	2.00567
M044_0.6	7	2.20271
M343_0.6	11	3.19979
s12	6	1.87251
165	4	2.5079
s100	7	1.86671
M227_0.6	7	2.01776
143	5	2.40551
23	10	1.70672
62	10	1.26723
53	11	1.55504
24	11	1.46397
0	10	1.26723
173	10	1.3376
127	11	1.55504
29	11	1.46397
10	10	1.26723
73	11	1.55504
149	11	1.55329
157	11	1.46397
M132_0.6	7	2.41952
M045_0.6	7	1.66573
M097_0.6	7	1.6737
M099_0.6	7	1.88245
M101_0.6	7	2.02726
M098_0.6	7	1.70478
151	8	1.31691
114	8	1.31691
116	8	1.31691
129	8	1.31691
107	8	1.42167
180	10	1.26723
18	11	1.55504
87	11	1.46397
M046_0.6	7	1.7582
M133_0.6	7	2.01163
M150_0.6	7	1.63228
M230_0.6	5	2.33711
M297_0.6	5	1.27122
s92	6	1.26659
M298_0.6	6	1.20756
M159_0.6	7	1.62327
M109_0.6	7	1.81278
M050_0.6	7	1.77185
M175_0.6	7	1.84229
M240_0.6	6	2.096
M047_0.6	7	1.87949
M048_0.6	7	2.30718
M238_0.6	7	1.8408
M049_0.6	7	1.89464
s102	7	2.05434
M212_0.6	6	2.05973
M051_0.6	7	1.80946
M142_0.6	7	1.77859
M237_0.6	6	2.14807
M209_0.6	7	2.23574
M052_0.6	7	2.06659
M234_0.6	6	1.8953
M235_0.6	7	1.962
M053_0.6	7	2.037
M145_0.6	7	2.20403
M161_0.6	7	1.88813
M054_0.6	7	2.13912
M143_0.6	7	1.93829
M164_0.6	6	2.06661
M055_0.6	7	2.02746
M246_0.6	5	1.38542
4	7	2.00637
37	9	1.46982
M056_0.6	7	1.83042
M121_0.6	7	2.01938
M124_0.6	7	1.82452
M057_0.6	7	2.00903
M129_0.6	7	2.35466
M299_0.6	12	1.33293
M058_0.6	7	2.04853
M184_0.6	7	1.7337
M139_0.6	7	1.93746
106	9	1.36444
M059_0.6	7	1.63767
170	9	1.46178
M061_0.6	7	1.91014
145_9163526.pfm	8	1.43877
M062_0.6	7	1.87243
M064_0.6	7	1.85743
M195_0.6	6	1.56736
s26	7	2.19757
s25	9	2.42724
s24	8	2.1472
M168_0.6	7	2.55301
M066_0.6	7	2.00136
M165_0.6	7	2.22469
M166_0.6	7	2.10726
M067_0.6	7	1.8895
M201_0.6	7	1.94258
M136_0.6	6	1.95247
M134_0.6	6	2.29399
M068_0.6	7	1.78908
M348_0.6	7	1.96238
M319_0.6	7	1.2299
M347_0.6	11	1.69684
M346_0.6	10	1.79751
M345_0.6	11	1.79661
M069_0.6	7	1.7175
s60	8	1.96135
s51	7	2.20511
M273_0.6	7	1.70738
s99	7	3.11692
s22	10	1.87353
M351_0.6	10	1.95422
s50	7	2.17604
M106_0.6	6	2.2454
s48	7	3.1226
s49	7	2.88355
126	7	1.72421
167	7	2.14539
M103_0.6	6	1.88388
M104_0.6	7	1.86716
M154_0.6	7	2.03341
M102_0.6	6	1.98924
M272_0.6	8	1.94332
325	7	1.86506
s104	7	1.60031
M087_0.6	7	1.87396
M019_0.6	7	1.9291
M088_0.6	7	1.77501
M086_0.6	7	2.03482
s55	11	1.58089
s53	7	2.00123
s46	9	2.04712
s57	10	1.88688
s59	8	2.66333
s52	7	2.53968
M352_0.6	9	2.10266
s58	10	1.88686
s47	9	1.7605
s56	11	1.78902
M070_0.6	6	2.24079
M274_0.6	9	1.73462
s37	7	1.38755
M332_0.6	10	1.75306
s40	8	2.07209
s41	9	1.85126
s39	7	1.87442
s19	5	2.19933
s42	6	2.32099
s45	9	1.92303
M071_0.6	6	1.99539
M353_0.6	9	1.89706
M331_0.6	10	1.93618
s97	5	2.2439
M333_0.6	5	2.08711
M072_0.6	7	2.28309
M065_0.6	7	2.19379
M279_0.6	10	2.44867
M170_0.6	7	1.76105
M114_0.6	7	1.71337
M236_0.6	7	2.11538
M123_0.6	7	1.8464
M074_0.6	6	2.14153
M214_0.6	7	1.90999
M189_0.6	7	1.62396
M190_0.6	7	2.28429
M192_0.6	6	1.99854
M193_0.6	6	1.83594
M216_0.6	7	1.91006
M196_0.6	7	1.95665
s68	4	1.35126
s9	5	1.80781
s10	6	1.67803
s11	7	1.45757
M075_0.6	7	1.88398
M156_0.6	7	1.82745
s63	4	1.35126
s6	5	1.80739
s7	6	1.64301
s8	7	1.57142
s65	9	1.21014
M219_0.6	6	1.75432
M005_0.6	7	1.77138
M076_0.6	6	2.02369
M073_0.6	7	2.22317
M220_0.6	7	1.86911
M221_0.6	7	2.03599
M222_0.6	7	1.68248
M197_0.6	6	1.95963
M204_0.6	7	1.82852
M077_0.6	7	1.68178
M078_0.6	7	1.83932
M079_0.6	7	1.89752
M107_0.6	7	1.95051
M080_0.6	7	1.93103
M081_0.6	6	1.66683
M111_0.6	7	1.67051
s54	4	1.35126
M082_0.6	7	1.91292
153	7	1.86506
M254_0.6	8	1.57356
115_7499328.pfm	8	1.57356
114_7499328.pfm	7	1.59137
113	7	1.86506
M354_0.6	6	2.602
M083_0.6	7	2.12175
M085_0.6	7	2.08045
M269_0.6	11	1.60482
155	6	2.00796
M350_0.6	9	1.73416
49	6	1.26659
M155_0.6	7	2.13814
s21	6	2.03143
s20	6	1.7793
1334	8	1.7554
1343	6	1.84349
1351	9	1.36444
1384	7	1.72421
1393	7	1.72421
